# Supplementary material for: Antimicrobial Activity against Fusarium oxysporum f. sp. dianthi of TiO2/ZnO Thin Films under UV Irradiation: Experimental and Theoretical Study
Source: PubMed Central journal article supplement — ACS Omega. 2024 Jul 10;9(29):31546–55. doi: 10.1021/acsomega.4c01287 (PMC11270707; doi:10.1021/acsomega.4c01287), 2024-07-10
Supplement: ao4c01287_si_001.pdf [file ao4c01287_si_001.pdf]

## Supporting Information

### Antimicrobial activity against *Fusarium oxysporum f. sp. dianthi* of TiO<sub>2</sub>/ZnO thin films under UV Irradiation: Experimental and Theoretical study

Cesar Quiñones<sup>1</sup>, Martha Posada<sup>2</sup>, Angie Hormiga<sup>2</sup>, Julian Peña<sup>3</sup>, Carlos Diaz-Uribe<sup>4</sup>, William Vallejo<sup>4\*</sup>, Amner Muñoz-Acevedo<sup>5</sup>, Vanesa Roa<sup>6</sup>, Eduardo Schott<sup>6</sup> and Ximena Zarate<sup>7</sup>

<sup>1</sup>*Facultad de ingeniería. Departamento de ingeniería Química. Universidad de la Salle, Bogotá, Colombia.*

<sup>2</sup>*Grupo de Investigación Ceparium, Universidad Colegio Mayor de Cundinamarca, Bogotá 111321 Colombia.*

<sup>3</sup>*Escuela de negocios, Universidad del Caribe (UNICARIBE), Santo Domingo, 11105, República Dominicana*

<sup>4</sup>*Grupo de Fotoquímica y Fotobiología, Universidad del Atlántico, Puerto Colombia 81007, Colombia.*

<sup>5</sup>*Grupo de Investigación en Química y Biología, Universidad del Norte, Puerto Colombia 81007, Colombia.*

<sup>6</sup>*Departamento de Química Inorgánica, Facultad de Química y Farmacia, Centro de Energía UC, Centro de Investigación en Nanotecnología y Materiales Avanzados CIEN-UC, Pontificia Universidad Católica de Chile, Avenida Vicuña Mackenna, 4860, Santiago, Chile.*

<sup>7</sup>*Instituto de Ciencias Químicas Aplicadas, Facultad de Ingeniería, Universidad Autónoma de Chile. Avenida Pedro de Valdivia 425, Santiago, Chile.*

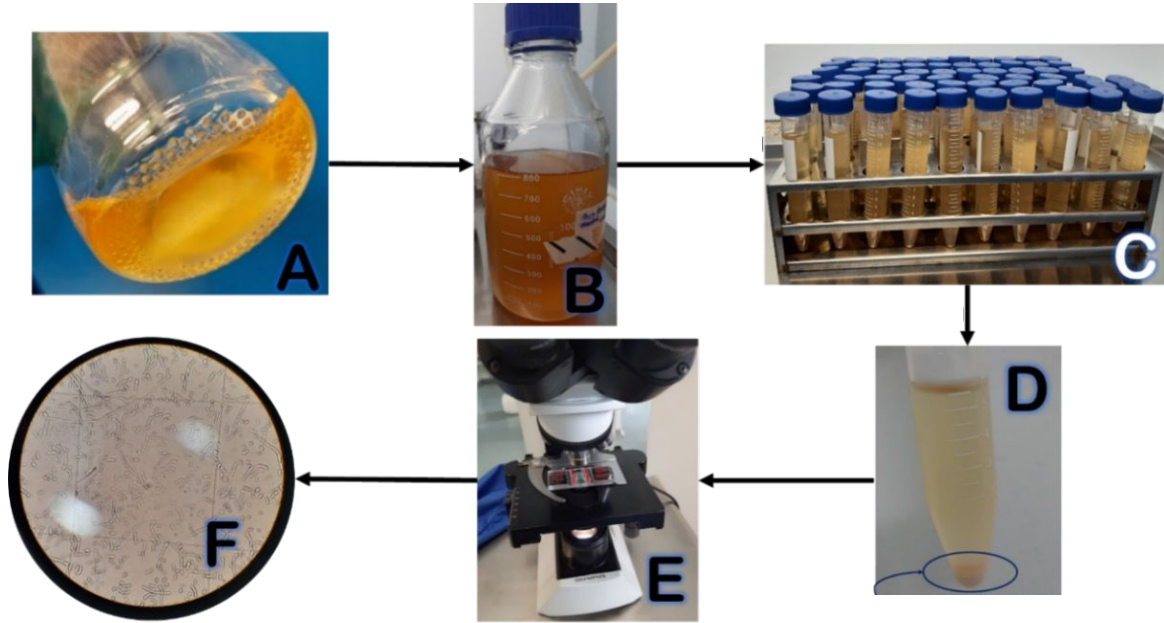

Figure S1. Process of collection and counting of *Fusarium oxysporum f. sp. Dianthi*. (A) Sample, (B) filtration, (C) distinction, (D) centrifugation, (E) sampling, (E) spores counting, (F) photo of spores counting.

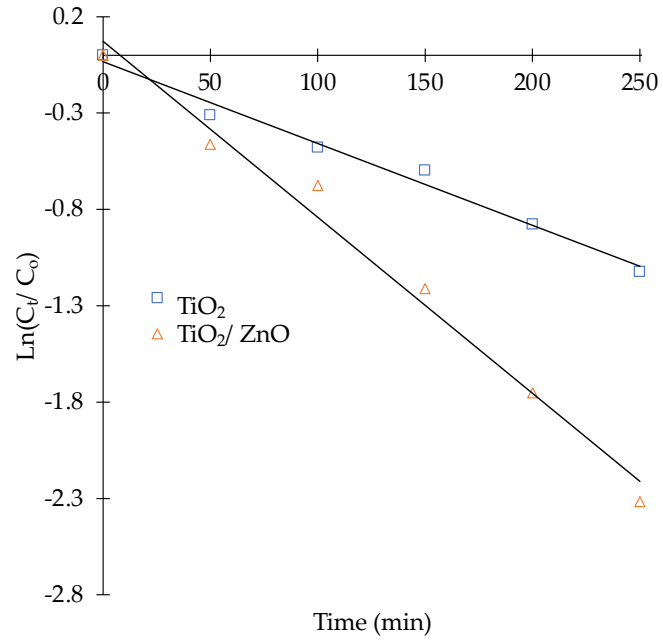

Figure S2. Langmuir-Hinshelwood fitting model of kinetical results shown in figure 10.

### Section S1. Kinetic study models

We studied the kinetic adsorption behavior of BM onto all materials fabricated by using the pseudo-first (1) and pseudo-second (2) kinetic models according to these equations:<sup>1</sup>

$$\ln (q_t - q_e) = \ln (q_e) - k_1 t \quad (1)$$

$$\frac{t}{q_t} = \frac{1}{k_2 q_e^2} + \frac{t}{q_e} \quad (2)$$

$$q_t = k_{id} t^{1/2} + C \quad (3)$$

Where  $q_t$  is the MB amount of adsorbed per unit mass of the adsorbent ( $\text{mg g}^{-1}$ ) at in every time.  $q_e$  is the maximum sorption capacity ( $\text{mg g}^{-1}$ ) and  $k_1$  ( $\text{min}^{-1}$ ) and  $k_2$  ( $\text{g mg}^{-1} \text{min}^{-1}$ ) are the rate constants of the pseudo-first and pseudo-second order models respectively. The  $k_{id}$  ( $\text{mg/ g}^{-1} \text{min}^{1/2}$ ) is the intraparticle diffusion rate constant. The fitting correlation coefficient ( $R^2$ ) and an average relative error (ARE) were used to determine the best-fitting isotherm:

$$ARE = \frac{100}{n} \sum_{i=1}^n \frac{|q_e - q_f|}{q_e} \quad (4)$$

where,  $q_e$  is the experimental value,  $q_f$  is the fitted value, and  $n$  is the number of data points.<sup>2</sup>

## References

- (1) Hamzenezjad Taghliabad, R.; Sepehr, E.; Khodaverdiloo, H.; Samadi, A.; Rasouli-Sadaghiani, M. H. Characterization of Cadmium Adsorption on Two Cost-Effective Biochars for Water Treatment. *Arab. J. Geosci.* **2020**, *13* (12), 1–10. <https://doi.org/10.1007/S12517-020-05477-6/METRICS>.
- (2) Diaz-Urbe, C.; Walteros, L.; Duran, F.; Vallejo, W.; Romero Bohórquez, A. R. Prosopis Juliflora Seed Waste as Biochar for the Removal of Blue Methylene: A Thermodynamic and Kinetic Study. *ACS Omega* **2022**. [https://doi.org/10.1021/ACSOMEGA.2C05007/ASSET/IMAGES/LARGE/AO2C05007\\_0010.JPEG](https://doi.org/10.1021/ACSOMEGA.2C05007/ASSET/IMAGES/LARGE/AO2C05007_0010.JPEG).
